# Supplementary material for: Genomic Insights and Biogeography of Endemic Galapagos Geckos: Unraveling Population Structure and Species Delimitation Across Human-Inhabited Islands
Source: Research Square preprint supplement (doi:10.21203/rs.3.rs-5703179/v1), 2025-01-31
Supplement: Supplementary file 1 [file ed068cd1a42e1f7ea2664bc9.docx]

**Supplementary Table S1:** FastQC Results for Concatenated Forward and Reverse Reads from Illumina Sequencing

|  | **Forward reads file** | **Reverse reads file** |
| --- | --- | --- |
| **Encoding** | Sanger/Illumina 1.9 | Sanger/Illumina 1.9 |
| **Total Sequences** | 1,021,167,325 | 1,021,167,325 |
| **Sequences flagged as poor quality** | 0 | 0 |
| **Sequence length** | 169 | 169 |
| **%GC** | 49 | 48 |
| **Mean Sequence Quality (Phred Score)** | 36 | 36 |

**Supplementary Table S2:** *Phyllodactylus* 93 individuals grouped according to geographic location and used in FST calculations. The coordinates provided were utilized in the calculation of the Mantel test.

| **Species** | **Group** | **Sampling sites** | **Individuals** | **Coodinates** | |
| --- | --- | --- | --- | --- | --- |
| **Latitude** | **Longitud** |
| *P. leei* | ChinPt | Puerto Chino | 4212 | -0.924559 | -89.430068 |
| 4226 |
| JarOpLob | Jardín de Opuntias | 4164 | -0.949374 | -89.552053 |
| Lobería | 4236 |
| 4238 |
| BaqTij | Playa Baquerizo | 4115 | -0.886683 | -89.606299 |
| 4124 |
| Tijeretas | 4145 |
| 4152 |
| SarPitt | Punta Pitt | 4127 | -0.71065 | -89.255007 |
| 4128 |
| 4131 |
| 4133 |
| Sardina Bay | 4138 |
| 4139 |
| *P. darwini* | ChinPt | Puerto Chino | 4211 | -0.921679 | -89.431926 |
| 4214 |
| 4215 |
| 4219 |
| 4220 |
| 4221 |
| 4222 |
| JarOpLob | Jardín de Opuntias | 4160 | -0.9366 | -89.549093 |
| Lobería | 4247 |
| 4248 |
| 4249 |
| BaqTij | Playa Baquerizo | 4119 | -0.889158 | -89.607709 |
| 4121 |
| Tijeretas | 4146 |
| 4150 |
| *P. galapagensis* | PlaRo | Playa Roja | 4032 | -0.50516 | -90.292013 |
| 4043 |
| 4044 |
| 4045 |
| 4046 |
| 4047 |
| PlaGa | Playa Garrapatero | 3977 | -0.690017 | -90.222547 |
| 3982 |
| 3983 |
| 3984 |
| 3988 |
| TorBay | Tortuga Bay | 3971 | -0.746085 | -90.319443 |
| 3972 |
| 4033 |
| 4037 |
| 4038 |
| 4039 |
| *P. baurii* | East | East Floreana | 4024 | -1.263424 | -90.363834 |
| 4027 |
| 4028 |
| 4029 |
| 4031 |
| North | North Floreana | 4012 | -1.238115 | -90.447014 |
| 4013 |
| 4014 |
| 4015 |
| 4017 |
| 4018 |
| 4019 |
| West | West Floreana | 3993 | -1.274557 | -90.486891 |
| 3994 |
| 3995 |
| 3997 |
| 3998 |
| *P. simpsoni* | CerrAz | Cerro Azul | 4100 | -0.978602 | -91.446231 |
| 4101 |
| 4102 |
| 4103 |
| 4105 |
| 4106 |
| VillPort | Villamil Port | 4054 | -0.961076 | -91.003257 |
| 4056 |
| 4057 |
| 4059 |
| 4061 |
| AlcVol | Alcedo Volcano | 4068 | -0.395281 | -90.997628 |
| 4072 |
| 4073 |
| 4074 |
| 4075 |
| 4077 |
| Fer | Fernandina Island | 4080 | -0.265652 | -91.447439 |
| 4081 |
| 4084 |
| 4086 |
| 4087 |
| 4089 |
| *P. simpsoni/P. andysabini* | WolfDarVol | Wolf Volcano | 4078 | -0.059604 | -91.40563 |
| 4079 |
| Darwin Volcano | 4092 |
| 4093 |
| 4094 |
| 4095 |

**Supplementary Table S3.** Tissue samples of endemic *Phyllodactylus* from the Galapagos used in this study, classified per island and locality

| **Species** | **Island** | **Locality** | **Tissue samples** | **Sequenced tissues** |
| --- | --- | --- | --- | --- |
| *Phyllodactylus andisabini* | Isabela | Puerto Bravo | 2 | 2 |
| *Phyllodactylus baurii* | Floreana | Puerto Velasco Ibarra | 10 | 5 |
| Post Office | 10 | 7 |
| Punta Ayora | 10 | 5 |
| *Phyllodactylus darwinii* | San Cristobal | Bahía Sardina | 1 | 1 |
| Cañada del Hospital | 1 | 0 |
| Jardín de Opuntias | 2 | 1 |
| Playa La Lobería | 5 | 3 |
| Playa Baquerizo | 2 | 2 |
| Puerto Baquerizo Moreno | 2 | 0 |
| Puerto Chino | 10 | 7 |
| Cerro Tijeretas | 5 | 2 |
| *Phyllodactylus galapagensis* | Santa Cruz | Playa Garrapatero | 10 | 6 |
| Playa Roja | 10 | 6 |
| Tortuga Bay | 10 | 6 |
| *Phyllodactylus leei* | San Cristobal | Bahía Sardina | 2 | 2 |
| Jardín de Opuntias | 4 | 1 |
| Playa La Lobería | 10 | 2 |
| Playa Baquerizo | 9 | 2 |
| Puerto Chino | 5 | 2 |
| Punta Pitt | 10 | 4 |
| Cerro Tijeretas | 6 | 2 |
| *Phyllodactulus simpsoni* | Fernandina | Punta Espinoza | 10 | 6 |
| Isabela | Muro de Lágrimas | 10 | 5 |
| Volcán Alcedo | 10 | 6 |
| Base Bolívar | 9 | 4 |
| Caleta Iguana | 9 | 6 |
|  |  | Total | 184 | 95 |

**Supplementary Table S4:** DNA concentration and Quality indices of all analyzed samples. DNA concentraction was performed using a Qubit 3 (Thermo Fisher Scientific, USA) and DNA quality indices were measured using a Nanodrop 2000 (Thermo Fisher Scientific, USA). Columns 1 and 2 show the species and code of each sample.

| **Species** | **Sample Code** | **DNA concentration ng/µl** | **Quality Index 260/280** | **Quality Index 260/230** | **Location** | **Latitud** | **Longitud** |
| --- | --- | --- | --- | --- | --- | --- | --- |
| *Phyllodactylus andysabini* | 4078 | 16.4 | 1,9 | 2,65 | Wolf Volcano | -0.059604 | -91.40563 |
| *Phyllodactylus andysabini* | 4079 | 23 | 1,86 | 2,37 | Wolf Volcano | -0.059634 | -91.405586 |
| *Phyllodactylus baurii* | 3993 | 25.8 | 1,88 | 2,1 | West Floreana | -1.281622 | -90.489236 |
| *Phyllodactylus baurii* | 3994 | 24.4 | 1,9 | 2,41 | West Floreana | -1.273985 | -90.486804 |
| *Phyllodactylus baurii* | 3995 | 22.2 | 1,92 | 2,47 | West Floreana | -1.274557 | -90.486891 |
| *Phyllodactylus baurii* | 3997 | 14.98 | 1,86 | 1,93 | West Floreana | -1.273795 | -90.486779 |
| *Phyllodactylus baurii* | 3998 | 22.8 | 1,93 | 3,15 | West Floreana | -1.273946 | -90.4868 |
| *Phyllodactylus baurii* | 4012 | 23.6 | 1,84 | 1,61 | North Floreana | -1.238027 | -90.446849 |
| *Phyllodactylus baurii* | 4013 | 22.4 | 1,84 | 1,62 | North Floreana | -1.232055 | -90.443856 |
| *Phyllodactylus baurii* | 4014 | 23.2 | 1,81 | 1,49 | North Floreana | -1.238115 | -90.447014 |
| *Phyllodactylus baurii* | 4015 | 21.4 | 1,83 | 1,68 | North Floreana | -1.238033 | -90.446833 |
| *Phyllodactylus baurii* | 4017 | 20.6 | 1,85 | 1,94 | North Floreana | -1.237996 | -90.446714 |
| *Phyllodactylus baurii* | 4018 | 22.8 | 1,88 | 1,3 | North Floreana | -1.238112 | -90.447141 |
| *Phyllodactylus baurii* | 4019 | 24 | 1,77 | 1,67 | North Floreana | -1.237988 | -90.447572 |
| *Phyllodactylus baurii* | 4024 | 20.6 | 1,78 | 1,17 | East Floreana | -1.263528 | -90.361706 |
| *Phyllodactylus baurii* | 4027 | 19.54 | 1,81 | 1,52 | East Floreana | -1.263554 | -90.363513 |
| *Phyllodactylus baurii* | 4028 | 19.42 | 1,84 | 1,38 | East Floreana | -1.263424 | -90.363834 |
| *Phyllodactylus baurii* | 4029 | 18.94 | 1,89 | 1,47 | East Floreana | -1.263726 | -90.365221 |
| *Phyllodactylus baurii* | 4031 | 17.2 | 1,9 | 2,19 | East Floreana | -1.263513 | -90.362424 |
| *Phyllodactylus darwinii* | 4119 | 21.2 | 1,83 | 2,4 | Playa Baquerizo | -0.889398 | -89.607825 |
| *Phyllodactylus darwinii* | 4121 | 16.6 | 1,83 | 2,22 | Playa Baquerizo | -0.88559 | -89.60608 |
| *Phyllodactylus darwinii* | 4140 | 8.92 | 3,42 | 0,3 | Sardina Bay | -0.703431 | -89.364888 |
| *Phyllodactylus darwinii* | 4146 | 15.1 | 1,95 | 2,17 | Tijeretas | -0.889158 | -89.607709 |
| *Phyllodactylus darwinii* | 4150 | 25 | 1,97 | 1,73 | Tijeretas | -0.889329 | -89.607974 |
| *Phyllodactylus darwinii* | 4160 | 15.4 | 1,89 | 2,31 | Jardín de Opuntias | -0.9366 | -89.549093 |
| *Phyllodactylus darwinii* | 4211 | 18 | 1,92 | 1,97 | Puerto Chino | -0.921679 | -89.431926 |
| *Phyllodactylus darwinii* | 4214 | 21 | 1,88 | 2,41 | Puerto Chino | -0.923874 | -89.430275 |
| *Phyllodactylus darwinii* | 4215 | 17.8 | 1,9 | 2,68 | Puerto Chino | -0.92162 | -89.431407 |
| *Phyllodactylus darwinii* | 4219 | 14.8 | 1,88 | 2,36 | Puerto Chino | -0.923682 | -89.430312 |
| *Phyllodactylus darwinii* | 4220 | 23.4 | 1,87 | 2,38 | Puerto Chino | -0.92341 | -89.430269 |
| *Phyllodactylus darwinii* | 4221 | 15.5 | 1,88 | 2,38 | Puerto Chino | -0.926341 | -89.430042 |
| *Phyllodactylus darwinii* | 4222 | 18.3 | 1,91 | 2,54 | Puerto Chino | -0.924667 | -89.430055 |
| *Phyllodactylus darwinii* | 4247 | 15.1 | 2,01 | 3,88 | Lobería | -0.922619 | -89.61564 |
| *Phyllodactylus darwinii* | 4248 | 16.3 | 1,98 | 2,87 | Lobería | -0.92459 | -89.61407 |
| *Phyllodactylus darwinii* | 4249 | 15.1 | 2,06 | 3,75 | Lobería | -0.922239 | -89.615348 |
| *Phyllodactylus galapagensis* | 3961 | 12.4 | 1,91 | 3,12 | Playa Garrapatero | -0.694131 | -90.22165 |
| *Phyllodactylus galapagensis* | 3971 | 16.2 | 2,11 | 4,15 | Tortuga Bay | -0.746076 | -90.319506 |
| *Phyllodactylus galapagensis* | 3972 | 18.6 | 1,9 | 2,3 | Tortuga Bay | -0.746085 | -90.319443 |
| *Phyllodactylus galapagensis* | 3977 | 11.6 | 1,89 | 2,12 | Playa Garrapatero | -0.690017 | -90.222547 |
| *Phyllodactylus galapagensis* | 3982 | 15.2 | 1,9 | 1,66 | Playa Garrapatero | -0.692802 | -90.221355 |
| *Phyllodactylus galapagensis* | 3983 | 16.5 | 1,97 | 2,26 | Playa Garrapatero | -0.692766 | -90.221533 |
| *Phyllodactylus galapagensis* | 3984 | 13.3 | 1,87 | 2,62 | Playa Garrapatero | -0.693201 | -90.221261 |
| *Phyllodactylus galapagensis* | 3988 | 16.4 | 1,91 | 2,16 | Playa Garrapatero | -0.693054 | -90.22123 |
| *Phyllodactylus galapagensis* | 4032 | 25.2 | 1,86 | 2,28 | Playa Roja | -0.50516 | -90.292013 |
| *Phyllodactylus galapagensis* | 4033 | 15.7 | 1,91 | 2,14 | Tortuga Bay | -0.748686 | -90.321635 |
| *Phyllodactylus galapagensis* | 4037 | 17.4 | 1,98 | 1,53 | Tortuga Bay | -0.751166 | -90.32388 |
| *Phyllodactylus galapagensis* | 4038 | 15.5 | 1,9 | 2,21 | Tortuga Bay | -0.756433 | -90.328643 |
| *Phyllodactylus galapagensis* | 4039 | 19.5 | 1,91 | 2,07 | Tortuga Bay | -0.749735 | -90.322576 |
| *Phyllodactylus galapagensis* | 4043 | 17 | 1,83 | 2,52 | Playa Roja | -0.497232 | -90.296936 |
| *Phyllodactylus galapagensis* | 4044 | 19.8 | 1,84 | 1,75 | Playa Roja | -0.497935 | -90.296107 |
| *Phyllodactylus galapagensis* | 4045 | 19.8 | 1,9 | 2,21 | Playa Roja | -0.497157 | -90.296229 |
| *Phyllodactylus galapagensis* | 4046 | 23.6 | 1,92 | 1,88 | Playa Roja | -0.496754 | -90.29816 |
| *Phyllodactylus galapagensis* | 4047 | 15.4 | 1,85 | 2,44 | Playa Roja | -0.496991 | -90.29675 |
| *Phyllodactylus leei* | 4115 | 15.5 | 1,87 | 1,34 | Playa Baquerizo | -0.886683 | -89.606299 |
| *Phyllodactylus leei* | 4124 | 17.2 | 1,86 | 1,98 | Playa Baquerizo | -0.88291 | -89.597826 |
| *Phyllodactylus leei* | 4127 | 24 | 1,89 | 2,72 | Punta Pitt | -0.711079 | -89.255623 |
| *Phyllodactylus leei* | 4128 | 21.2 | 1,88 | 1,68 | Punta Pitt | -0.71065 | -89.255007 |
| *Phyllodactylus leei* | 4131 | 16.6 | 1,9 | 2,44 | Punta Pitt | -0.713738 | -89.253688 |
| *Phyllodactylus leei* | 4133 | 23.2 | 1,88 | 2,4 | Punta Pitt | -0.711066 | -89.255629 |
| *Phyllodactylus leei* | 4138 | 23 | 1,94 | 2,81 | Sardina Bay | -0.703748 | -89.364709 |
| *Phyllodactylus leei* | 4139 | 22.8 | 1,88 | 2,11 | Sardina Bay | -0.703629 | -89.364687 |
| *Phyllodactylus leei* | 4145 | 20 | 1,83 | 2,36 | Tijeretas | -0.889317 | -89.607982 |
| *Phyllodactylus leei* | 4152 | 16.4 | 1,84 | 2,15 | Tijeretas | -0.888045 | -89.608642 |
| *Phyllodactylus leei* | 4164 | 19.4 | 1,86 | 1,97 | Jardín de Opuntias | -0.949374 | -89.552053 |
| *Phyllodactylus leei* | 4212 | 15.7 | 1,95 | 2,09 | Puerto Chino | -0.924559 | -89.430068 |
| *Phyllodactylus leei* | 4226 | 14 | 1,84 | 1,32 | Puerto Chino | -0.923682 | -89.430312 |
| *Phyllodactylus leei* | 4236 | 15.1 | 1,8 | 0,36 | Lobería | -0.924626 | -89.614181 |
| *Phyllodactylus leei* | 4238 | 15.1 | 1,93 | 2,38 | Lobería | -0.924836 | -89.61402 |
| *Phyllodactylus simpsoni* | 4054 | 15.6 | 1,89 | 1,47 | Villamil Port | -0.961076 | -91.003257 |
| *Phyllodactylus simpsoni* | 4056 | 17.6 | 1,9 | 2,19 | Villamil Port | -0.964864 | -91.013435 |
| *Phyllodactylus simpsoni* | 4057 | 17.8 | 1,87 | 1 | Villamil Port | -0.964864 | -91.013435 |
| *Phyllodactylus simpsoni* | 4059 | 24.6 | 1,93 | 1,82 | Villamil Port | -0.966409 | -91.012998 |
| *Phyllodactylus simpsoni* | 4061 | 16.9 | 1,86 | 2,08 | Villamil Port | -0.960223 | -90.9992 |
| *Phyllodactylus simpsoni* | 4068 | 19.5 | 1,9 | 2,65 | Alcedo Volcano | -0.394867 | -90.996427 |
| *Phyllodactylus simpsoni* | 4072 | 16.3 | 1,91 | 2,14 | Alcedo Volcano | -0.395281 | -90.997628 |
| *Phyllodactylus simpsoni* | 4073 | 15 | 1,98 | 1,53 | Alcedo Volcano | -0.394968 | -90.998387 |
| *Phyllodactylus simpsoni* | 4074 | 15.2 | 1,9 | 2,21 | Alcedo Volcano | -0.395809 | -91.000052 |
| *Phyllodactylus simpsoni* | 4075 | 19.2 | 1,91 | 2,07 | Alcedo Volcano | -0.395801 | -91.000062 |
| *Phyllodactylus simpsoni* | 4077 | 18.5 | 1,85 | 2,65 | Alcedo Volcano | -0.395229 | -90.997711 |
| *Phyllodactylus simpsoni* | 4080 | 24 | 1,91 | 3,02 | Fernandina | -0.265749 | -91.447728 |
| *Phyllodactylus simpsoni* | 4081 | 19.96 | 2,11 | 4,15 | Fernandina | -0.26537 | -91.44601 |
| *Phyllodactylus simpsoni* | 4084 | 22.2 | 1,9 | 2,3 | Fernandina | -0.265652 | -91.447439 |
| *Phyllodactylus simpsoni* | 4086 | 24.6 | 1,89 | 2,12 | Fernandina | -0.265642 | -91.44737 |
| *Phyllodactylus simpsoni* | 4087 | 25 | 1,9 | 1,66 | Fernandina | -0.265562 | -91.447348 |
| *Phyllodactylus simpsoni* | 4089 | 24 | 1,97 | 2,26 | Fernandina | -0.265548 | -91.447581 |
| *Phyllodactylus simpsoni* | 4092 | 18 | 1,82 | 1,64 | Darwin Volcano | -0.285927 | -91.360725 |
| *Phyllodactylus simpsoni* | 4093 | 16.2 | 1,86 | 2,65 | Darwin Volcano | -0.285919 | -91.360729 |
| *Phyllodactylus simpsoni* | 4094 | 16.1 | 1,85 | 2,54 | Darwin Volcano | -0.285906 | -91.360729 |
| *Phyllodactylus simpsoni* | 4095 | 19.9 | 1,79 | 1,25 | Darwin Volcano | -0.285906 | -91.360743 |
| *Phyllodactylus simpsoni* | 4100 | 19.6 | 1,82 | 1,85 | Cerro Azul | -0.978584 | -91.446214 |
| *Phyllodactylus simpsoni* | 4101 | 14.3 | 1,81 | 1,59 | Cerro Azul | -0.978602 | -91.446231 |
| *Phyllodactylus simpsoni* | 4102 | 17.9 | 1,83 | 1,91 | Cerro Azul | -0.978595 | -91.44624 |
| *Phyllodactylus simpsoni* | 4103 | 20.2 | 1,82 | 1,57 | Cerro Azul | -0.978596 | -91.446219 |
| *Phyllodactylus simpsoni* | 4105 | 15.1 | 1,8 | 1,46 | Cerro Azul | -0.978586 | -91.44621 |
| *Phyllodactylus simpsoni* | 4106 | 16.3 | 1,87 | 2,09 | Cerro Azul | -0.978602 | -91.446215 |


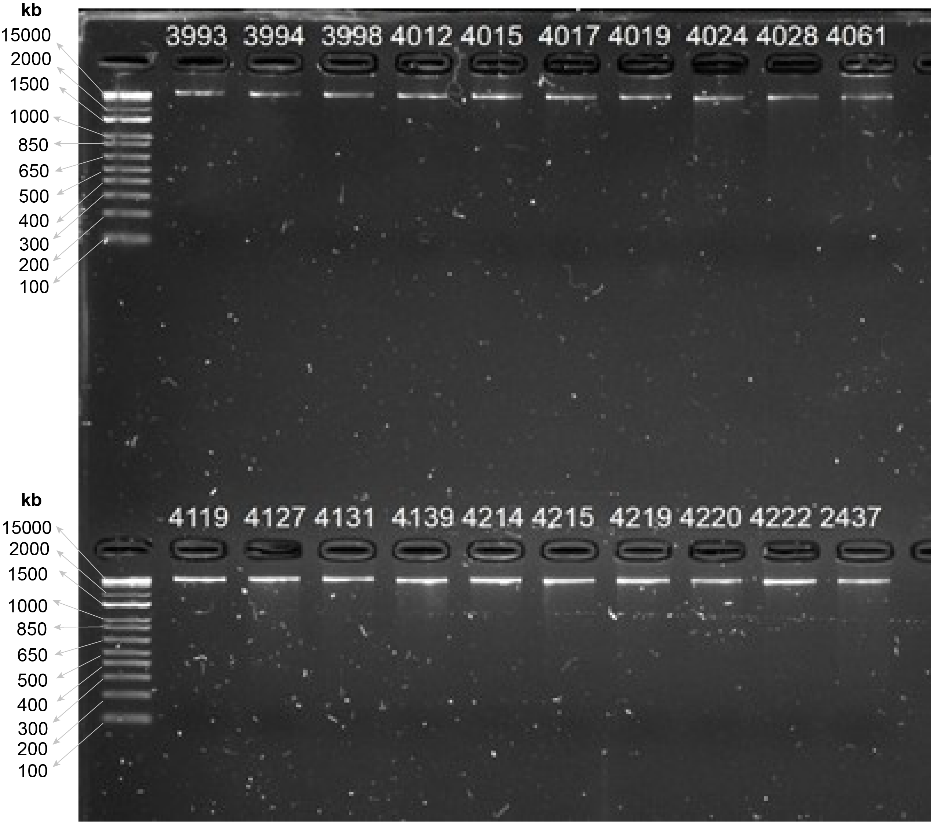


Supplementary Figure S. Agarose gel electrophoresis 1.5% (w/v) of genomic DNA. First row: from left to right, lane 1: Invitrogen™ TrackIt™ 1Kb Plus DNA Ladder. Lanes 2-11 Phyllodactylus samples. Second row: from left to right, lane 1: Invitrogen™ TrackIt™ 1Kb Plus DNA Ladder. Lanes 2-11 Phyllodactylus samples.
